# Supplementary material for: Evaluation of Circulating miRNA Biomarkers of Testicular Germ Cell Tumors during Therapy and Follow-up―A Copenhagen Experience
Source: PubMed Central journal article supplement (PMC7140092; doi:10.3390/cancers12030759), 2020-03-23
Supplement: cancers-12-00759-s001.pdf [file cancers-12-00759-s001.pdf]

**Supplementary Materials**
**Table 1.** Patient characteristics of methodological optimization cohort.

| Clinical cohort | Methodological      |
|-----------------|---------------------|
|                 | Number of cases (%) |
| Controls        | 4 (100%)            |
| Healthy         | 1 (25%)             |
| Inflammation    | 2 (50%)             |
| Non-GCT TC      | 1 (25%)             |
| tgct patients   | 11 (100%)           |
| gcnis           | 1 (9.1%)            |
| s               | 5 (45.5%)           |
| ns              | 5 (45.5%)           |
| Mixed           | 2 (18.2%)           |
| EC              | 2 (18.2%)           |
| C               | -                   |
| T               | 1 (9.1%)            |

(T)GCT: (testicular) germ cell tumour, TC: testicular cancer, GCNIS: germ cell neoplasia in situ, S: seminoma, NS: non-seminoma, EC: embryonal carcinoma, C: choriocarcinoma, T: teratoma.

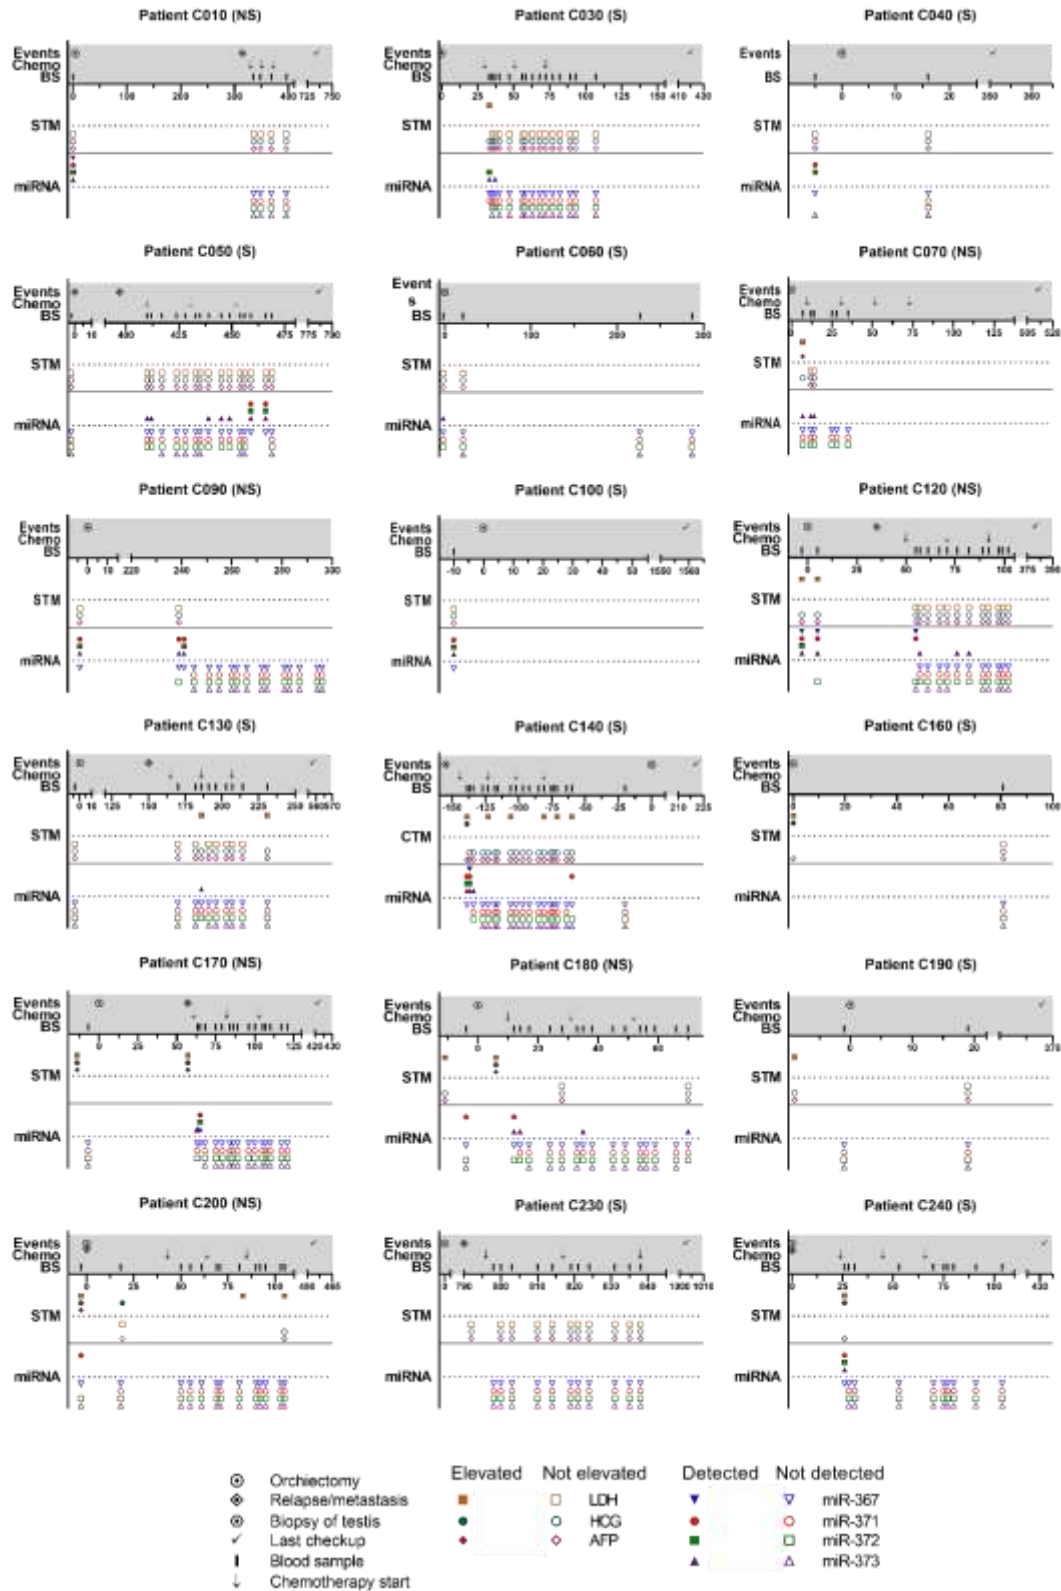

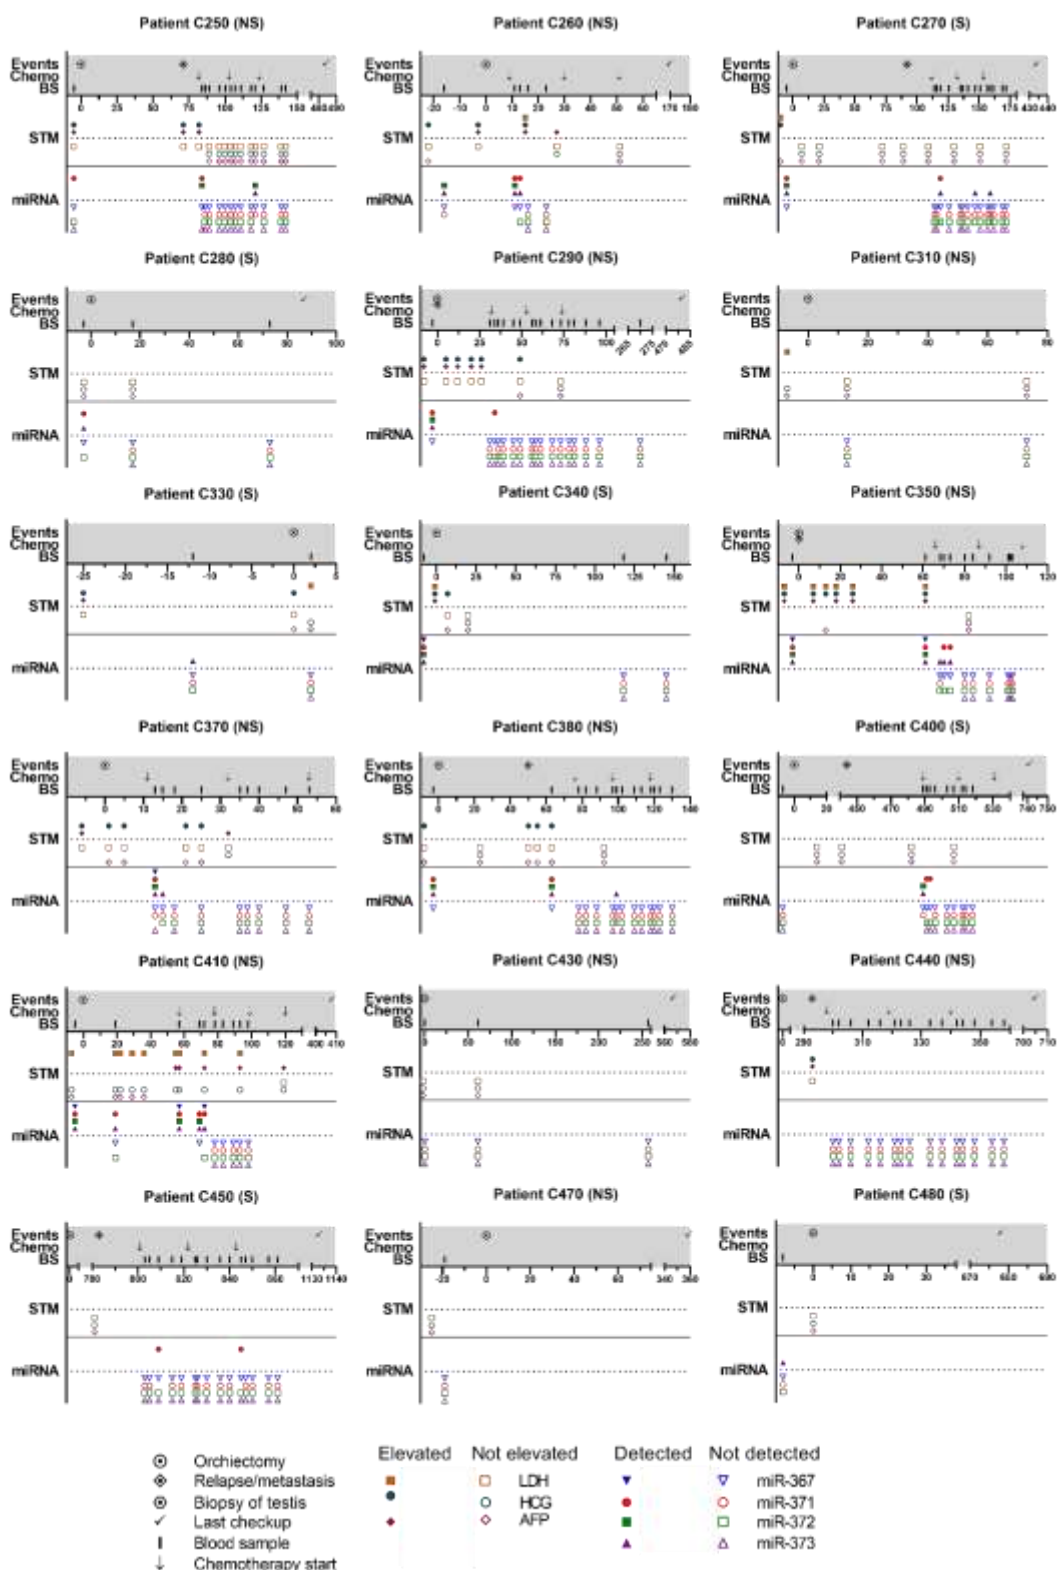

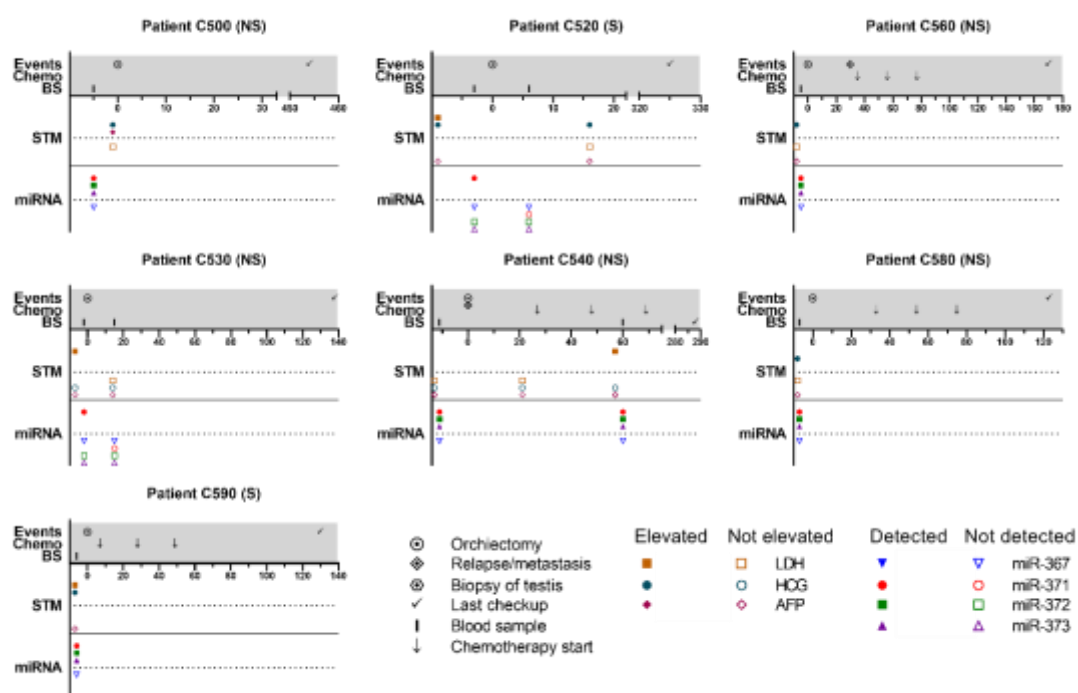

**Figure 1.** Complete patient histories of the remaining patients of the study with both miRNA and STM measurements. Patient with GCNIS not included in figure, since the patient did not undergo orchidectomy. Abbreviations used: STM; serum tumor markers, NS; non-seminoma, S; seminoma, BS; blood sample, Chemo; chemotherapy, LDH; Lactate dehydrogenase, HCG; beta-human chorionic gonadotropin, AFP; alpha-fetoprotein, miRs; miRNAs.
